# Supplementary material
Source: publisher figshare collection journal article supplement (https://karger.figshare.com/ndownloader/files/21672294)
Supplement: Supplementary file 1 [file 21672294]

Supplementary Material

Supplementary Table 1: Changes in Sleep

| **Gene** | **CHR** | **SNP** | **A1** | **MAF** | **OR** | **P** |
| --- | --- | --- | --- | --- | --- | --- |
| 44kb 3' of SNX18 | 5 | rs2565010 | C | 0.14 | 0.2156 | 1.06E-06 |
| 181kb 3’ of KIF26A | 14 | rs11846347 | G | 0.31 | 0.2909 | 3.19E-06 |
| 323kb 3' of STIM2 | 4 | rs3846343 | C | 0.36 | 0.3046 | 5.21E-06 |
| NDST3 | 4 | rs7436139 | G | 0.12 | 0.2605 | 5.21E-06 |
| 183kb 3’ of KIF26A | 14 | rs4575477 | G | 0.32 | 0.3028 | 5.57E-06 |
| 358kb 3' of STIM2 | 4 | rs13107491 | G | 0.3 | 0.3083 | 5.87E-06 |
| NDST3 | 4 | rs6835510 | A | 0.066 | 0.1882 | 5.90E-06 |
| 175kb 3’ of KIF26A | 14 | rs59193267 | A | 0.32 | 0.3024 | 5.93E-06 |
| 180kb 3’ of KIF26A | 14 | rs11849430 | C | 0.32 | 0.3024 | 5.93E-06 |
| 163kb 5’ of MIRA4300 | 11 | rs680029 | T | 0.43 | 4.872 | 6.36E-06 |
| 62kb 3' of MOBP | 3 | rs77121946 | C | 0.06 | 0.2008 | 7.40E-06 |
| 140kb 3' of MOBP | 3 | rs76968955 | C | 0.06 | 0.2063 | 9.48E-06 |
| 322kb 3' of STIM2 | 4 | rs6831198 | A | 0.25 | 0.3146 | 9.94E-06 |

Chr=Chromosome; SNP=single nucleotide polymorphism; A1=first allele; MAF=minor allele frequency; OR=odds ratio; P=p-value

Supplementary Table 2: Decreased Sleep

| Gene | CHR | SNP | A1 | MAF | OR | P |
| --- | --- | --- | --- | --- | --- | --- |
| 99kb 5’ of TET2 | 4 | rs12499100 | A | 0.42 | 0.4035 | 4.82E-07 |
| 98kb 5’ of TET2 | 4 | rs7676563 | T | 0.42 | 0.4035 | 4.82E-07 |
| 96kb 5’ of TET2 | 4 | rs2866763 | C | 0.42 | 0.4035 | 4.82E-07 |
| 95kb 5’ of TET2 | 4 | rs6533173 | T | 0.42 | 0.4035 | 4.82E-07 |
| 90kb 5’ of TET2 | 4 | rs4563501 | A | 0.42 | 0.4035 | 4.82E-07 |
| 90kb 5’ of TET2 | 4 | rs6847240 | T | 0.42 | 0.4035 | 4.82E-07 |
| 89kb 5’ of TET2 | 4 | rs1844655 | G | 0.42 | 0.4035 | 4.82E-07 |
| 87kb 5’ of TET2 | 4 | rs4699151 | A | 0.42 | 0.4035 | 4.82E-07 |
| 85kb 5’ of TET2 | 4 | rs35822090 | T | 0.42 | 0.4035 | 4.82E-07 |
| 80kb 5’ of TET2 | 4 | rs195149 | A | 0.42 | 0.4035 | 4.82E-07 |
| 79kb 5’ of TET2 | 4 | rs168989 | T | 0.42 | 0.4035 | 4.82E-07 |
| 131kb 5’ of TET2 | 4 | rs4699146 | G | 0.43 | 0.4026 | 6.01E-07 |
| 106kb 5’ of TET2 | 4 | rs7676227 | G | 0.43 | 0.4063 | 6.09E-07 |
| 104kb 5’ of TET2 | 4 | rs57440313 | G | 0.43 | 0.4257 | 1.59E-06 |
| 129kb 5’ of TET2 | 4 | rs139801964 | C | 0.4 | 0.4351 | 2.06E-06 |
| 129kb 5’ of TET2 | 4 | rs144320387 | G | 0.4 | 0.4351 | 2.06E-06 |
| 129kb 5’ of TET2 | 4 | rs187926645 | G | 0.4 | 0.4351 | 2.06E-06 |
| 127kb 5’ of TET2 | 4 | rs4699147 | T | 0.4 | 0.4351 | 2.06E-06 |
| RASGEF1C | 5 | rs57288534 | T | 0.17 | 3.309 | 8.72E-06 |
| RYR2 | 1 | rs10802610 | C | 0.22 | 0.4045 | 8.90E-06 |
| RYR2 | 1 | rs12041884 | A | 0.22 | 0.3997 | 9.45E-06 |

Chr=Chromosome; SNP=single nucleotide polymorphism; A1=first allele; MAF=minor allele frequency; OR=odds ratio; P=p-value

Supplementary Table 3: Increased Sleep

| Gene | CHR | SNP | A1 | MAF | OR | P |
| --- | --- | --- | --- | --- | --- | --- |
| ANTXR1 | 2 | rs4076190 | G | 0.35 | 0.4583 | 2.77E-06 |
| SLC14A2 | 18 | rs79804212 | T | 0.12 | 0.3137 | 4.35E-06 |
| 109kb 5’ of ID2 | 2 | rs4669291 | T | 0.22 | 2.758 | 5.28E-06 |
| 108kb 5’ of ID2 | 2 | rs12999015 | T | 0.21 | 2.778 | 5.85E-06 |
| 31kb 3' of CLYBL | 13 | rs61972394 | T | 0.16 | 3.159 | 6.15E-06 |
| 455kb 3’ of SI | 3 | rs6779203 | C | 0.48 | 2.018 | 7.09E-06 |
| 116kb 5’ of ID2 | 2 | rs10929535 | T | 0.23 | 2.658 | 7.73E-06 |
| 113kb 5’ of ID2 | 2 | rs7572890 | A | 0.23 | 2.639 | 7.93E-06 |
| 284kb 5’ of KIF2B | 17 | rs17644088 | G | 0.2 | 2.654 | 9.69E-06 |
| 280kb 5’ of KIF2B | 17 | rs62071284 | G | 0.2 | 2.654 | 9.69E-06 |

Chr=Chromosome; SNP=single nucleotide polymorphism; A1=first allele; MAF=minor allele frequency; OR=odds ratio; P=p-value
